# Supplementary material for: Engineering efficient termination of bacteriophage T7 RNA polymerase transcription
Source: PubMed Central journal article supplement (PMC9157156; doi:10.1093/g3journal/jkac070), 2022-03-28

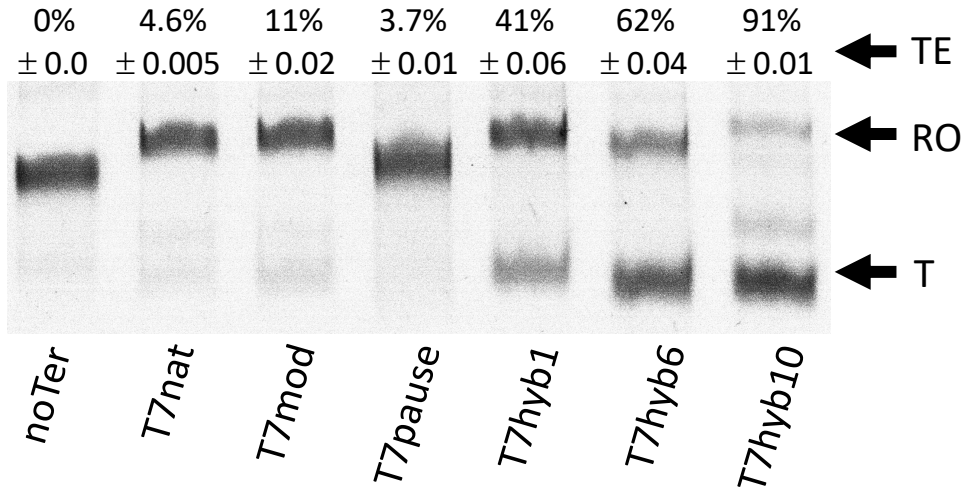

Supplement: jkac070_supplementary_figure_s2.pdf [file jkac070_supplementary_figure_s2.pdf]
